# Supplementary material
Source: publisher figshare collection journal article supplement (https://karger.figshare.com/ndownloader/files/30750337)
Supplement: Supplementary file 1 [file 30750337]

**Table S2. Feeding scheme.**

| **Day** | **Feeding frequency** | **Formulated milk (mL/time)** | **Ratio of milk to water** | **Note** |
| --- | --- | --- | --- | --- |
| 0~2 | 1 time/2~3h | 10~20 | 1:8 | - |
| 3~7 | 1 time /4h | 20~30 | 1:8 | - |
| 8~14 | 1 time /4h | 30~75 | 1:8 | - |
| 15~21 | 1 time /6h | 60~100 | 1:6 | - |
| 22~35 | 1 time /6h | 100~150 | 1:6 | supplementation with meat paste ≤ 10g/time |
| 36~42 | 1 time /8h | 90~120 | 1:6 | supplementation with meat paste ≤ 60~80 g/time |
| 43~49 | 2 time /d | defined amount | 1:6 | feeding meat and defined amount milk |
| 49 later | 2 time/d | - | - | weaning, feeding meat |
